# Supplementary material
Source: PubMed Central journal article supplement (PMC9891201)

---

**Supplementary information**

---

**mRNA ageing shapes the Cap2 methylome in mammalian mRNA**

---

In the format provided by the  
authors and unedited

Vladimir Despici and Samie R. Jaffrey, **Supplementary Information Figure 1.**

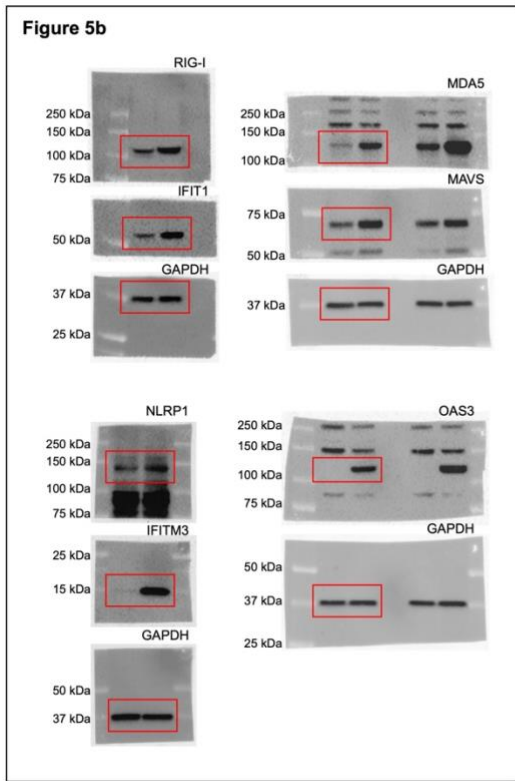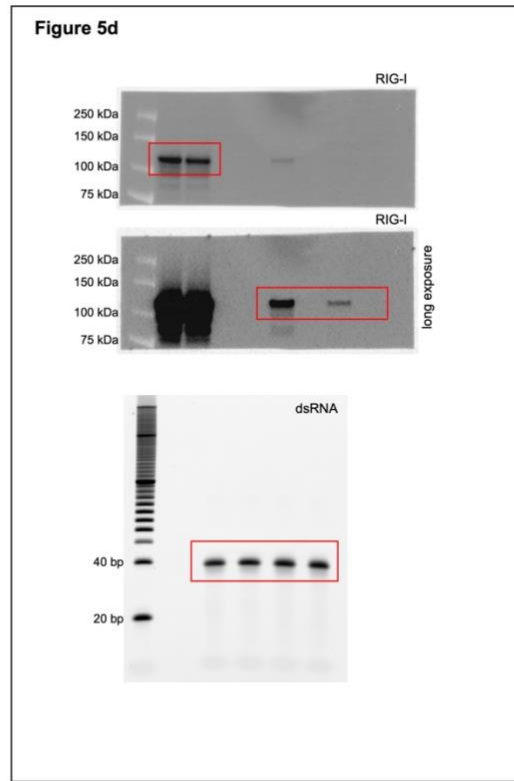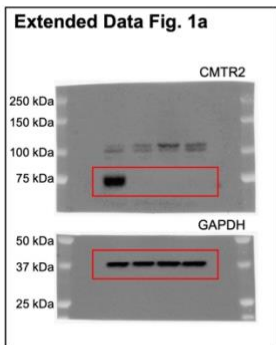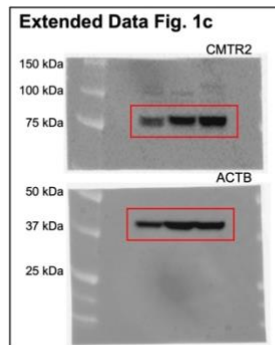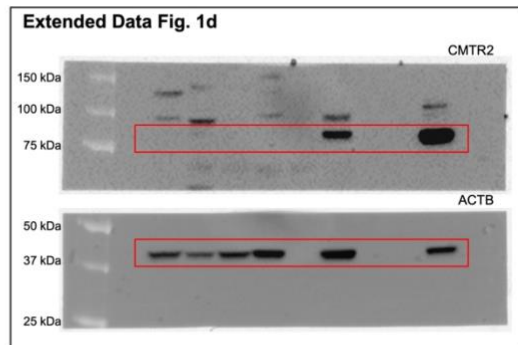

Extended Data Fig. 2a

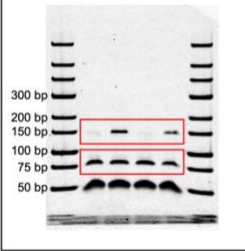

Extended Data Fig.3b

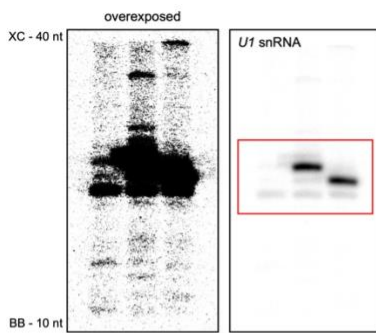

Extended Data Fig.3c

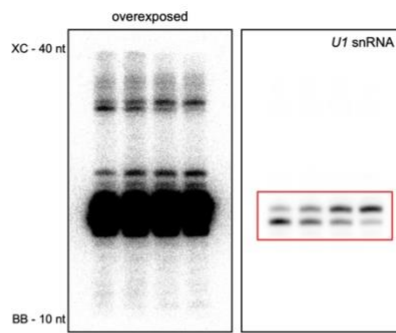

Extended Data Fig.3d

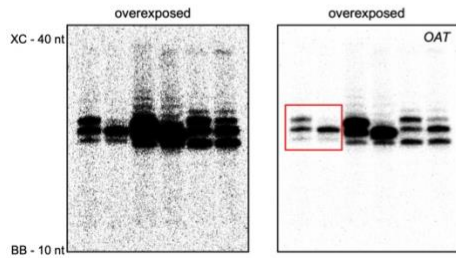

Extended Data Fig.3e

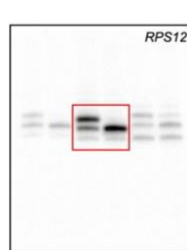

20 cm 15% TBE-Urea gel ran until Bromophenol Blue (BB) dye reached the end of the gel. Cap1 and Cap2 oligos run in the middle part of the gel between BB (10 nts) and Xylene Cyanol (XC - 40 nts) dyes, corresponding to the expected range of 17-22 nts.



**Extended Data Fig.8a**

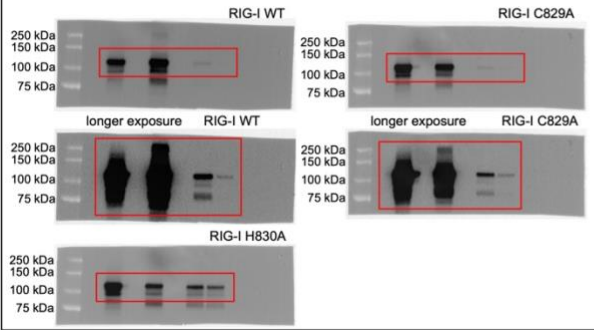

**Extended Data Fig.8b**

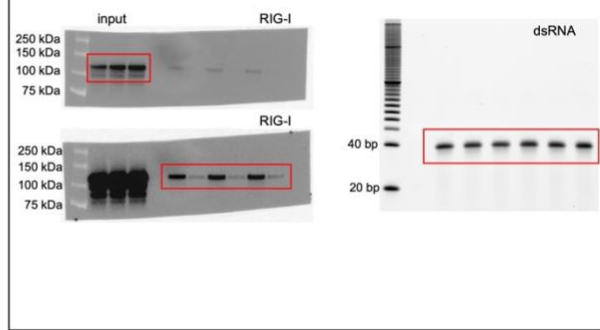

**Extended Data Fig. 9a**

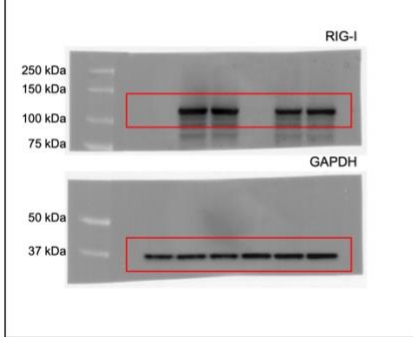

**Extended Data Fig. 9b**

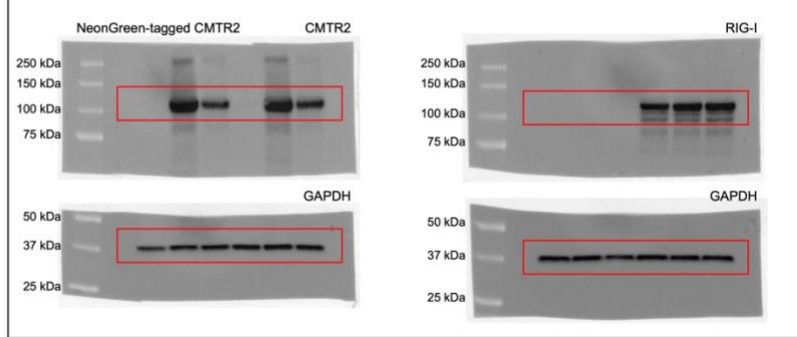

**Extended Data Fig. 10a**

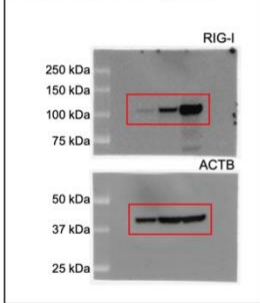

**Extended Data Fig. 10b**

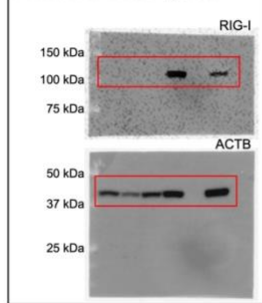

Supplement: 41586_2022_5668_MOESM1_ESM.pdf [file 41586_2022_5668_MOESM1_ESM.pdf]
